# Supplementary material for: Evolutionary conservation of regulated longevity assurance mechanisms
Source: Springer Nature journal article supplement (doi:10.1186/gb-2007-8-7-r132), 2007-07-05

A, Glutathione-S-transferases

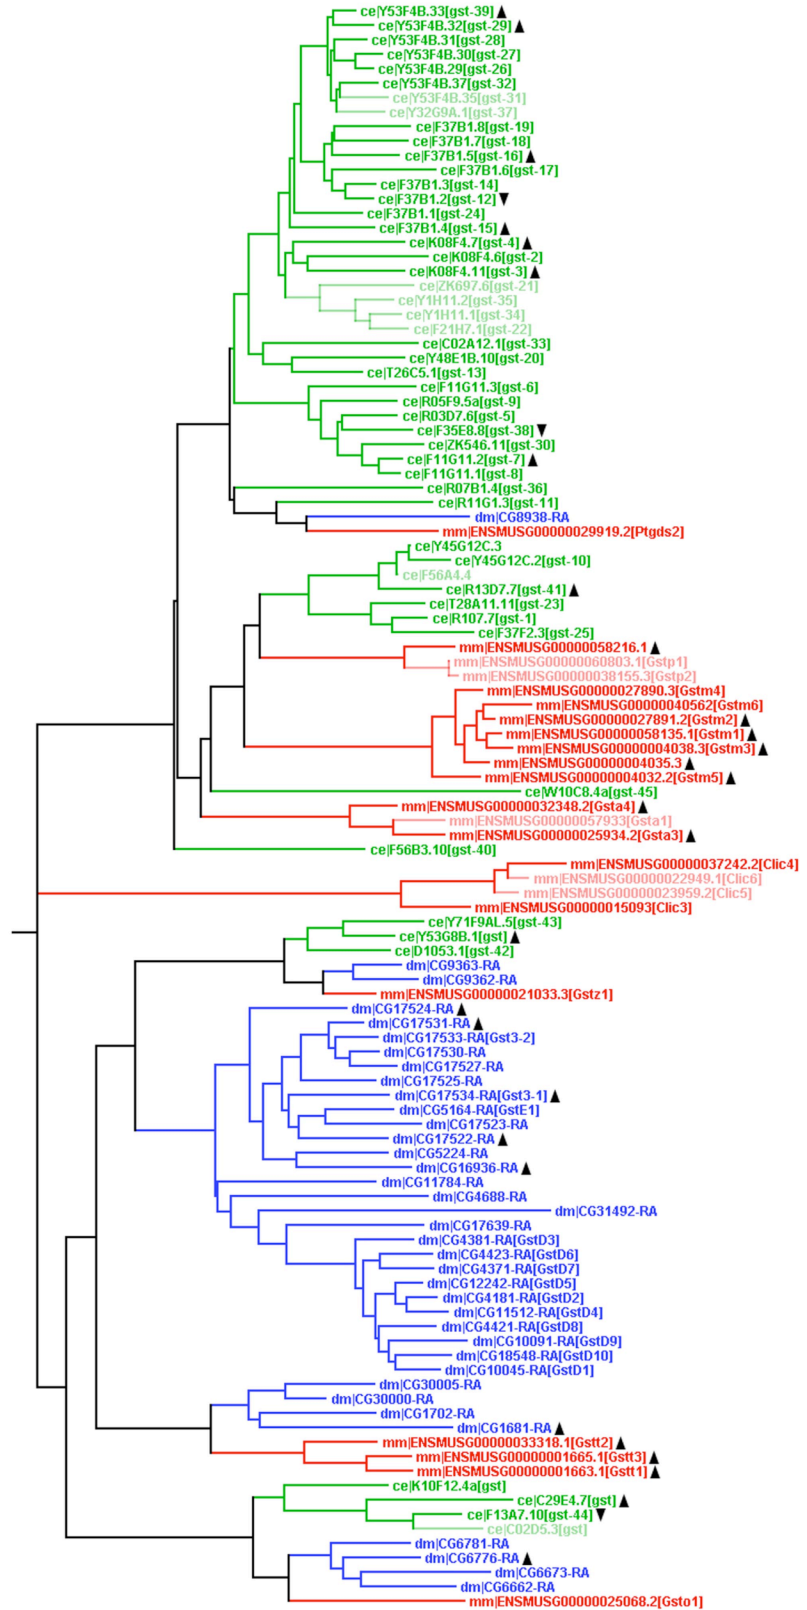



# C, Short-chain dehydrogenases

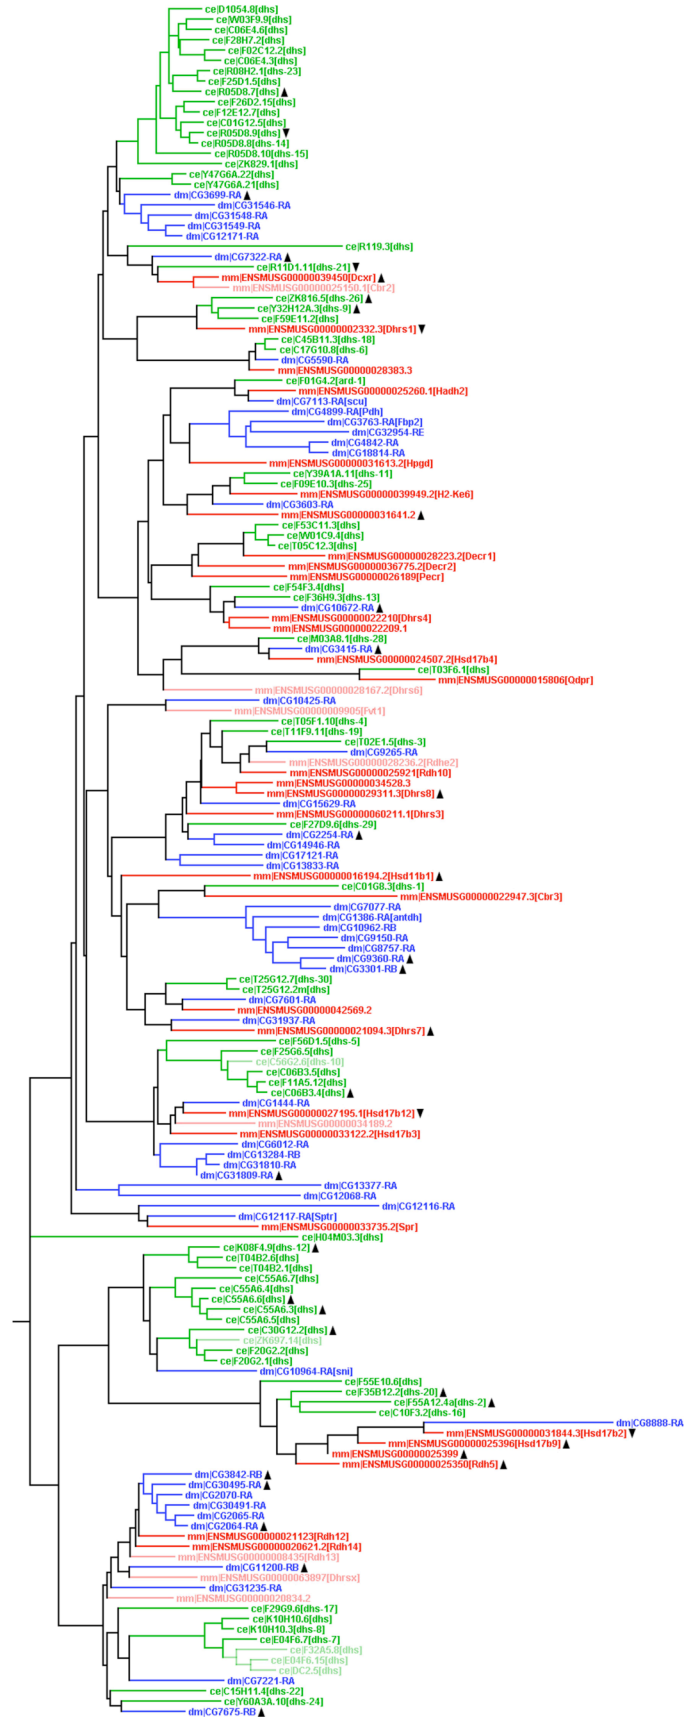

D, UDP-Glucuronosyl transferases

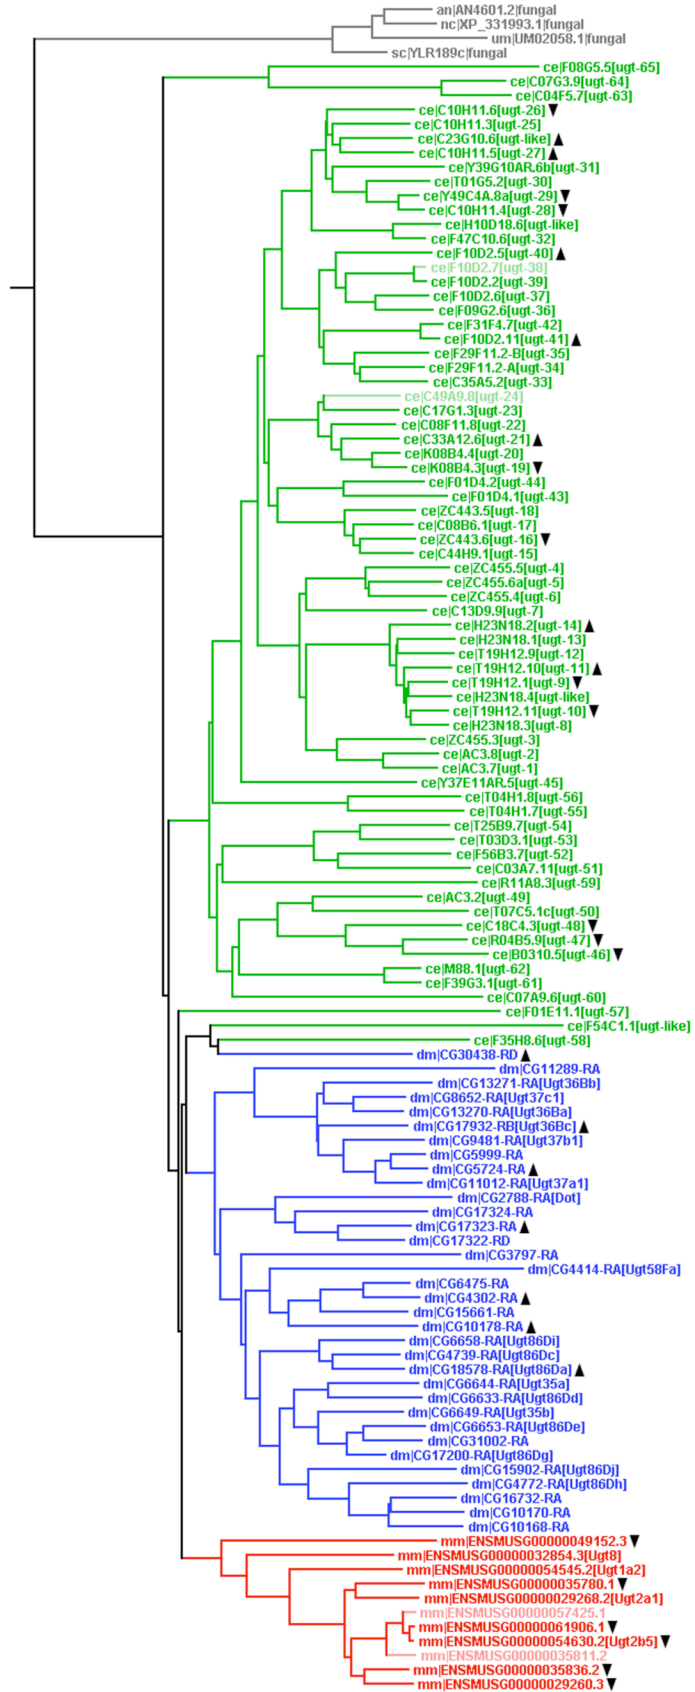

Supplement: 13059_2006_1613_MOESM2_ESM.pdf [file 13059_2006_1613_MOESM2_ESM.pdf]
